# Supplementary material
Source: MDPI journal article supplement (https://www.mdpi.com/2225-1154/8/2/29)
Supplement: s1 [file s1]

Supplementary Materials:

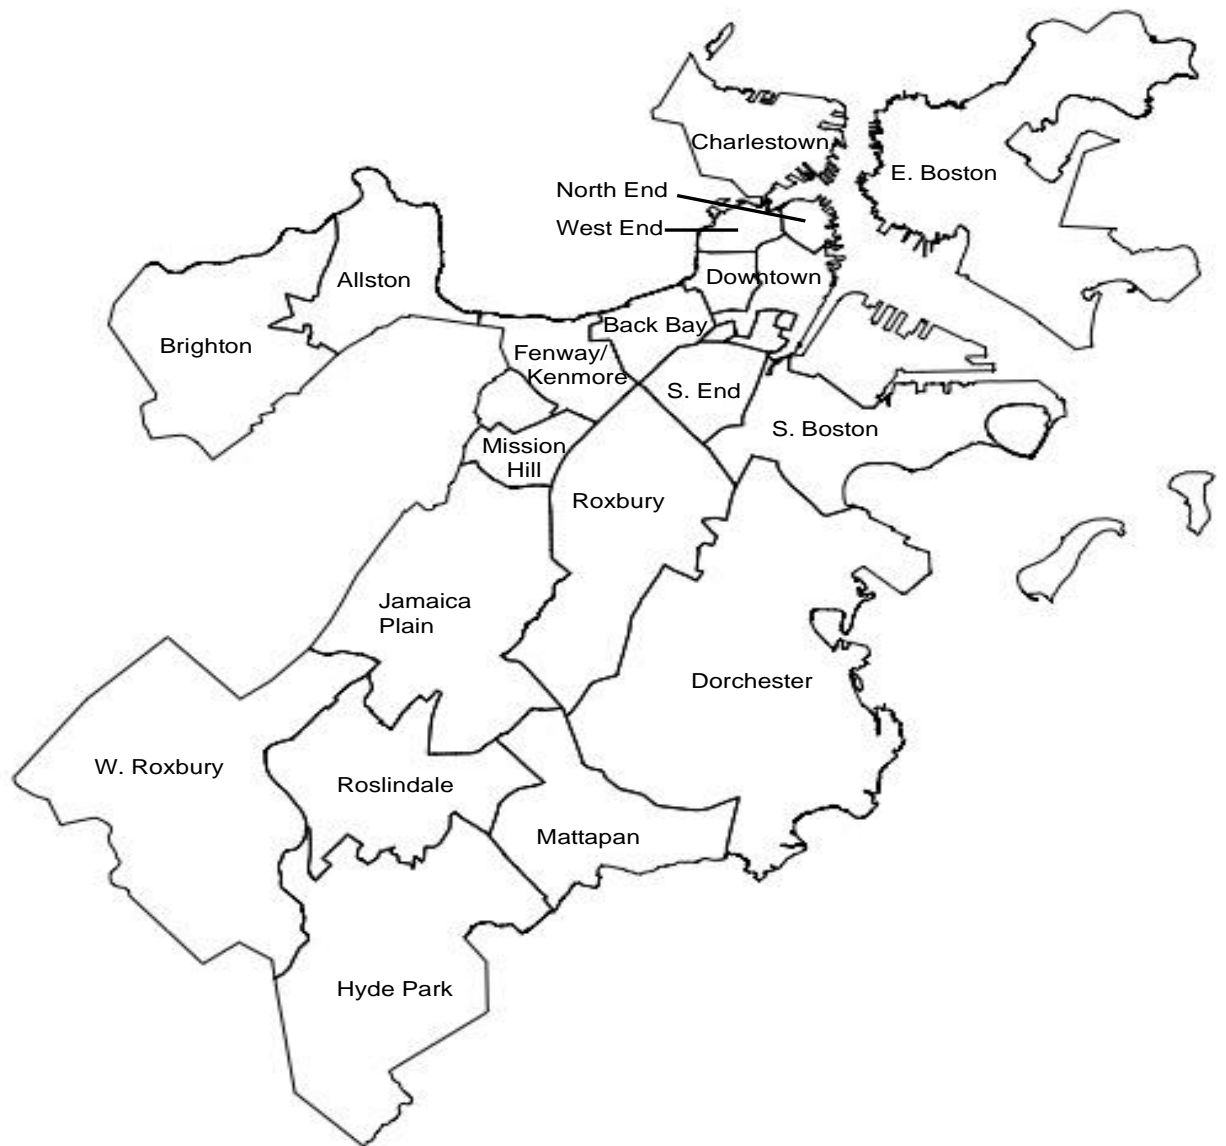

**Figure S1.** Neighborhoods of Boston, MA.

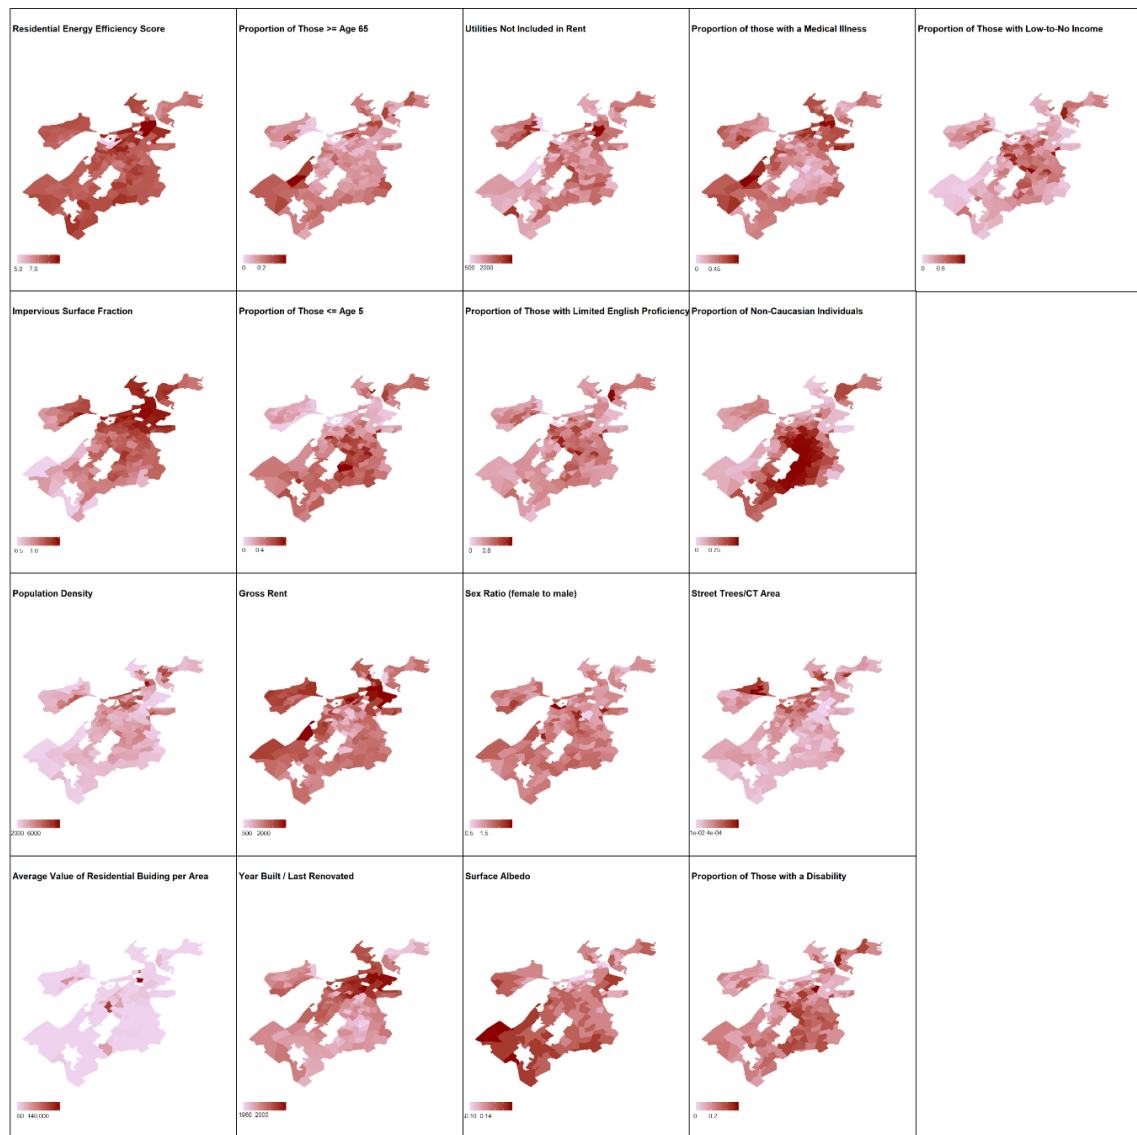

**Figure S2.** Distribution of the all small-area social and environmental vulnerability factors, Boston, 2000–2015. CT denotes census tract..

**Table S1.** Summary of results from GLM analyses limited only to hot days. Bold p-values are significant at an  $\alpha=0.05$  level. All covariates were analyzed using a standardized z-score to center and scale each them respectively.

|                                                 | Estimate | Standard Error | t value | p-value          |
|-------------------------------------------------|----------|----------------|---------|------------------|
| Intercept                                       | 3.34     | 0.19           | 17.28   | <b>&lt;0.001</b> |
| T <sub>MAX</sub>                                | 0.00     | 0.01           | -0.10   | 0.92             |
| Mean CT Albedo                                  | -0.05    | 0.04           | -1.09   | 0.28             |
| Trees/CT Area                                   | 0.05     | 0.02           | 2.09    | <b>0.04</b>      |
| Mean Value of Building/Area                     | 0.00     | 0.02           | -0.04   | 0.97             |
| Impervious Surface Fraction                     | 0.07     | 0.04           | 1.71    | 0.09             |
| Population Density                              | -0.03    | 0.03           | -0.89   | 0.37             |
| Proportion of those in CT with a Disability     | -0.03    | 0.03           | -0.82   | 0.41             |
| Proportion of those in CT Age $\geq 65$         | 0.08     | 0.03           | 3.08    | <b>&lt;0.001</b> |
| Proportion of those in CT with Low-to-No Income | -0.04    | 0.03           | -1.17   | 0.24             |

**Table S2.** Summary of results from semiparametric GWR model analyses, restricted to those at-home deaths that occurred on hot days, using the same model that was found to be the best fit from the GLM, but allowing the covariates to vary spatially. All covariates were analyzed using a standardized z-score to center and scale each them respectively. CT indicates census tract and Qu. Indicates quartile.

|                                                 | Minimum | 1 <sup>st</sup> Qu. | Median | 3 <sup>rd</sup> Qu. | Maximum | Global |
|-------------------------------------------------|---------|---------------------|--------|---------------------|---------|--------|
| Intercept                                       | -12.88  | 8.90                | 20.33  | 37.44               | 114.00  | 15.53  |
| T <sub>MAX</sub>                                | -2.68   | -0.25               | 0.01   | 0.41                | 1.24    | 0.13   |
| Mean CT Albedo                                  | -25.64  | -8.48               | -1.34  | 6.46                | 31.79   | -0.94  |
| Trees/CT Area                                   | -14.13  | -2.27               | 3.44   | 6.35                | 23.58   | 1.39   |
| Mean Value of Building/Area                     | -73.78  | 0.20                | 2.08   | 13.28               | 158.29  | -0.31  |
| Impervious Surface Fraction                     | -20.68  | -3.82               | 1.50   | 5.99                | 23.28   | 2.41   |
| Population Density                              | -22.83  | -4.18               | -0.08  | 9.08                | 41.24   | -0.80  |
| Proportion of those in CT with a Disability     | -14.58  | -5.37               | -3.08  | 3.19                | 20.81   | -1.31  |
| Proportion of those in CT Age $\geq 65$         | -14.61  | -0.87               | 2.19   | 4.28                | 19.33   | 2.65   |
| Proportion of those in CT with Low-to-No Income | -46.33  | -11.87              | -1.27  | 7.40                | 15.14   | -1.02  |

**Table S3.** Summary of results from GLM analyses limited to only days where  $HI_{MAX} \geq 86$  °F at Logan International Airport. Bold p-values are significant at an  $\alpha = 0.05$  level. All covariates were analyzed using a standardized z-score to center and scale each them respectively.

|                                                 | Estimate | Standard Error | t value | p-value           |
|-------------------------------------------------|----------|----------------|---------|-------------------|
| Intercept                                       | 3.13     | 0.11           | 27.32   | <b>&lt; 0.001</b> |
| $T_{MAX}$                                       | 0.01     | 0.00           | 1.40    | 0.16              |
| Mean CT Albedo                                  | -0.05    | 0.04           | -1.26   | 0.21              |
| Trees/CT Area                                   | 0.03     | 0.02           | 1.35    | 0.18              |
| Impervious Surface Fraction                     | 0.08     | 0.04           | 2.07    | <b>0.04</b>       |
| Proportion of those in CT with a Disability     | -0.04    | 0.03           | -1.30   | 0.19              |
| Proportion of those in CT Age $\geq 65$         | 0.10     | 0.02           | 4.16    | <b>&lt; 0.001</b> |
| Proportion of those in CT with Low-to-No Income | -0.04    | 0.03           | -1.26   | 0.21              |

**Table S4.** Summary of results from semiparametric GWR model analyses, restricted to those at-home deaths that occurred on days where  $HI_{MAX} \geq 86$  °F at Logan International Airport, using the same model that was found to be the best fit from the GLM, but allowing the covariates to vary spatially. All covariates were analyzed using a standardized z-score to center and scale each them respectively. CT indicates census tract and Qu. Indicates quartile.

|                                                 | Minimum | 1 <sup>st</sup> Qu. | Median | 3 <sup>rd</sup> Qu. | Maximum | Global |
|-------------------------------------------------|---------|---------------------|--------|---------------------|---------|--------|
| Intercept                                       | -33.11  | 8.89                | 16.10  | 22.86               | 115.81  | 14.30  |
| $HI_{MAX}$                                      | -0.19   | 0.00                | 0.08   | 0.19                | 1.53    | 0.14   |
| Mean CT Albedo                                  | -31.80  | -7.81               | -1.70  | 3.64                | 13.02   | -1.39  |
| Trees/CT Area                                   | -18.71  | -2.80               | 0.70   | 7.24                | 22.70   | 0.86   |
| Impervious Surface Fraction                     | -77.55  | -5.70               | 0.32   | 4.27                | 23.06   | 2.37   |
| Proportion of those in CT with a Disability     | -35.30  | -6.66               | -2.13  | 1.98                | 17.72   | -1.23  |
| Proportion of those in CT Age $\geq 65$         | -11.19  | 1.36                | 4.65   | 7.41                | 17.80   | 3.04   |
| Proportion of those in CT with Low-to-No Income | -22.83  | -4.23               | -0.67  | 2.56                | 134.64  | -1.11  |
| Proportion of those in CT who are non-Caucasian | -134.31 | -3.14               | 4.29   | 8.13                | 31.32   | 0.74   |

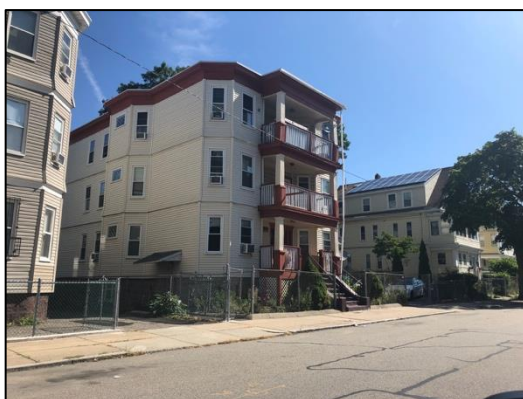

**Figure S3.** Image of triple-decker homes that are common in BostonMA..

**a) Jamaica Plain**

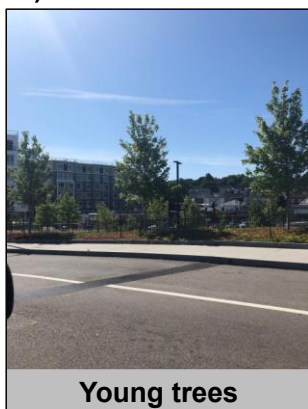

**Young trees**

**b) Roxbury**

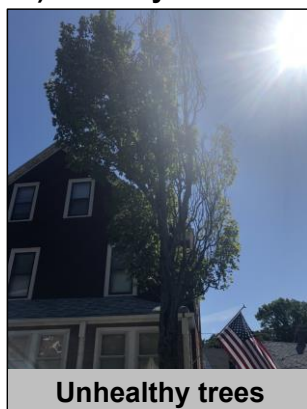

**Unhealthy trees**

**c) Dorchester**

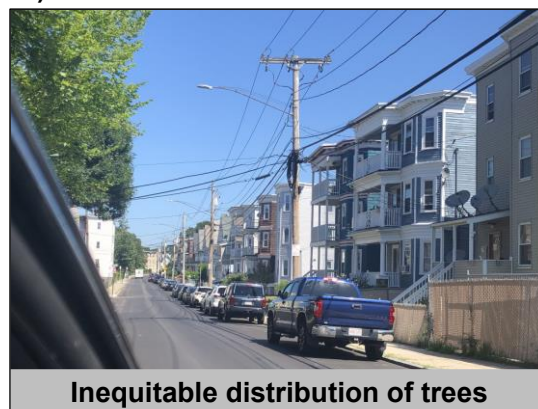

**Inequitable distribution of trees**

**Figure S4.** Images of street trees of varying quality, found in (a) Jamaica Plain, (b) Roxbury, and (c) Dorchester, demonstrating examples of the variety in design and quality of street trees.
